# Supplementary material for: Pharmacological Inhibition of Toll-Like Receptor-4 Signaling by TAK242 Prevents and Induces Regression of Experimental Organ Fibrosis
Source: PubMed Central journal article supplement (PMC6207051; doi:10.3389/fimmu.2018.02434), 2018-10-23

### **Supplementary Figure 1.**

Normal skin fibroblasts were incubated with TAK242 (as indicated) for indicated periods. **A.** After 24 h, cytotoxicity was determined (percent of LDH release). **B.** Fibroblasts from wt and TLR4 mutant mice skin transiently transfected with COL1A1-luc were incubated in medium with endotoxin-stripped Fn<sup>EDA</sup> (1 ug/ml) in the presence or absence of TAK242 (3uM) for 24 h. Whole-cell lysates were assayed for their luciferase activities. Results are means  $\pm$  SD from three determinations. \* $P = 0.004$ , Fn<sup>EDA</sup> alone versus treated with TAK242 in wt.  $P = \text{ns}$ , Fn<sup>EDA</sup> alone versus treated with TAK242 in TLR4 mutant. Sidak's multiple comparison test. ns, not significant.

### **Supplementary Figure 2.**

Fibroblasts from three healthy donors' skin were incubated in medium with TAK242 (3uM) for 24 h and mRNA levels were determined by real-time qPCR. Results, normalized with GAPDH, are means  $\pm$  s.d. compared to vehicle-treated controls. Control versus TAK242; Paired t-test.  $P = \text{ns}$ . not significant. Each dot and color represents an individual.

## Supplementary Table 1

### SSc fibroblasts derived from the subjects indicated below

| Sample ID | Age | Sex | dc/lc | Disease stage | MRSS |
|-----------|-----|-----|-------|---------------|------|
| SSc1107   | 48  | M   | dcSSc | Early         | 25   |
| SSc1121   | 47  | F   | dcSSc | Late          | 26   |
| SSc1068   | 49  | F   | dcSSc | Late          | 27   |
| SSc1097   | 64  | F   | dcSSc | Early         | 9    |

dcSSc diffuse cutaneous SSc; F, female; M, male; mRSS, modified Rodnan skin score (1 to 51).

## Supplementary Fig. 1

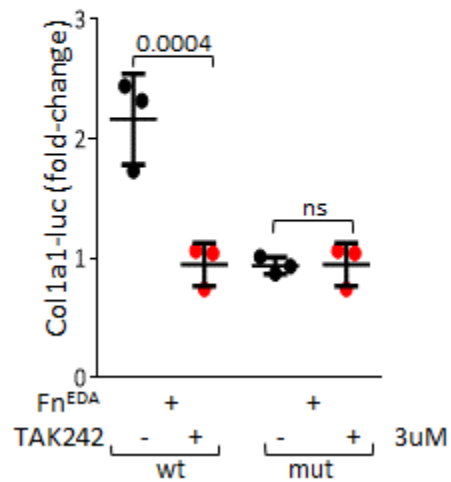

Supplementary Fig. 2

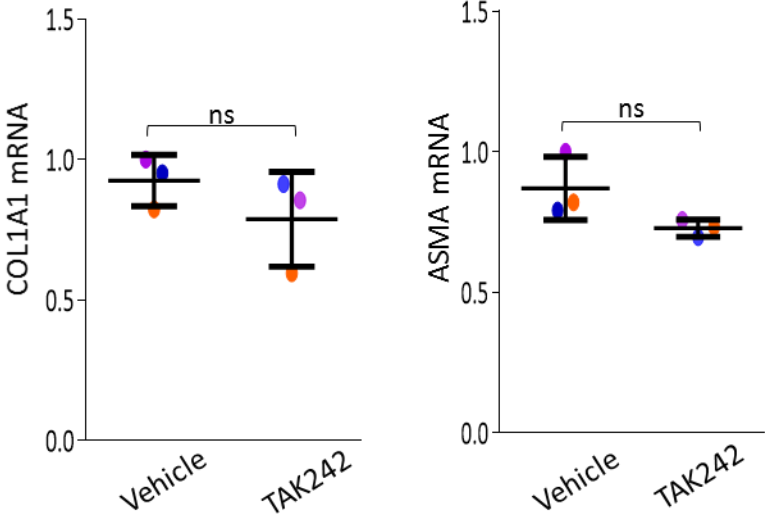

Supplement: Table_1.pdf [file Table_1.pdf]
